# Supplementary material for: Roles of the Developmental Regulator unc-62/Homothorax in Limiting Longevity in Caenorhabditis elegans
Source: PLoS Genet. 2013 Feb 28;9(2):e1003325. doi: 10.1371/journal.pgen.1003325 (PMC3585033; doi:10.1371/journal.pgen.1003325)
Supplement: Table S1 — RNA-seq experiment summary information. Values indicate number of reads meeting the stated criteria observed from RNA-seq experiments performed on three biological replicates of day four adult worms grown either on empty vector control, or unc-62 RNAi. “Post-quality filtering” indicates reads that did not contain a stretch of ten or more consecutive A or T nucleotides (which were discarded as likely artifacts from the reverse transcription oligonucleotide). Reads were mapped to the WS215 genome and annotated transcripts with Bowtie (see Methods), and were then discarded if they mapped with an equal number of mismatches to multiple positions in the genome. To simplify downstream analyses, at the final step only reads mapping to the sense strand of annotated transcripts were used. “Vitellogenin transcripts” indicates the number of reads in each experiment that mapped to the six vitellogenin loci (in this row, reads were kept if they mapped equally well to multiple vitellogenin loci but to no other loci in the genome). (XLSX) [file pgen.1003325.s012.xlsx]

## Sheet: Sheet1
	Empty vector control				unc-62 RNAi
	Lane 4				Lane 6
	Multiplexing barcode				Multiplexing barcode
	ATCACG	CGATGT	TTAGGC	total	ATCACG	CGATGT	TTAGGC	total
Post-quality filtering	20015973	23541466	27564852	71122291	21974064	29407277	21821537	73202878
Mapped to WS215 genome + transcriptome	17227629	21262128	24696976	63186733	18686414	25607554	20170244	64464212
(%)	0.8607	0.9032	0.896	0.8884	0.8504	0.8708	0.9243	0.8806
Mapped uniquely to WS215 transcriptome + genome	15188765	17100858	21463842	53753465	17124802	22868980	18502339	58496121
Mapped uniquely to WS215 transcripts (sense strand)	14447878	16434891	20754282	51637051	16146160	21830075	17864540	55840775
Vitellogenin transcripts	719374	1082549	819356	2621279	121778	149716	87488	358982
